# Supplementary material for: Seiche excitation in a highly stratified fjord of southern Chile: the Reloncaví fjord
Source: Copernicus journal article supplement (doi:10.5194/os-2016-42), 2016-07-07
Supplement: Supplementary file 1 [file os-2016-42-supplement.pdf]

# 1 Supporting Information

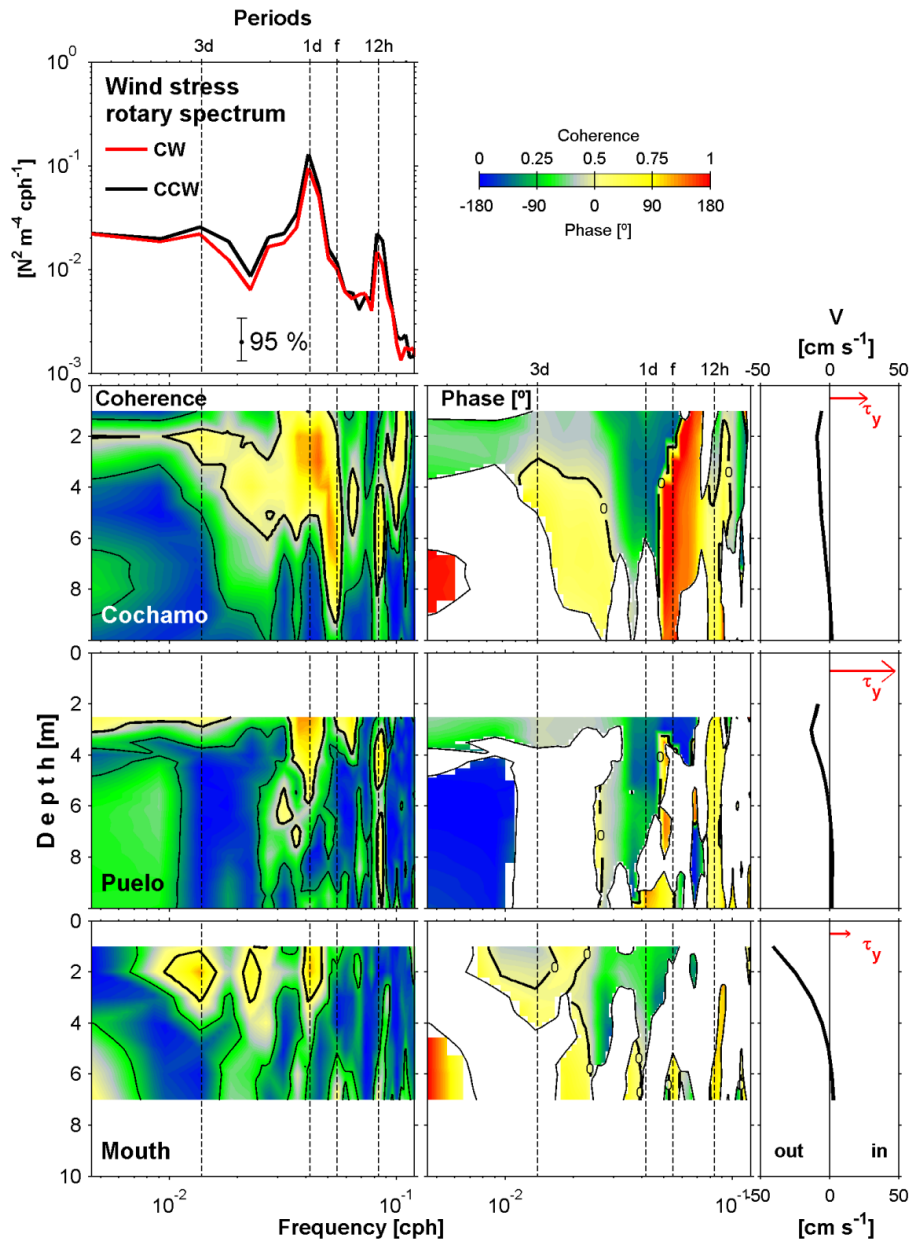

2  
 3 **S1 Figure:** Relationship between wind stress and currents. The upper-left insert presents the  
 4 rotary spectrum of the wind stress. Here, the red line indicates clockwise rotations (CW) and the  
 5 black line counter-clockwise (CCW) rotations. The bar indicates the 95% confidence interval.  
 6 The coherence and phase spectra between  $\tau_y$  and the along-fjord component in the upper 10 m are  
 7 presented in contour plots. In the coherence, black lines indicate coherences over 80% (thin) and  
 8 99% (wide) confidence levels. In the phase spectra, only phases with coherences over 80%  
 9 confidence levels were plotted (the thin black line obtained from the coherence spectra). To  
 10 emphasize the changes in phase, we included the  $0^\circ$  contour (wide black line) in the phase  
 11 spectra. The mean profile of the along-fjord currents and the mean  $\tau_y$  were included in the right  
 12 inserts. Dashed vertical lines denote the three-day, one-day, inertial ( $f$ ), and 12-hour periods.

1  
2 **S2 Table:** Locations of the ADCP and sealevel moorings and the meteorological station. Here  
3 presents details of the time series measured on the Reloncavi fjord. You must notice that the error  
4 (\*) on the ADCP, results from the measurement configuration whereas the accuracy and  
5 resolution came from factory.  
6

| site           | Instrument               | depth [m]    | Lat [°S] | Lon [°W] | dates                         | interval [min.] | depth cell [m] | error*                       | accuracy                                          | resolution                     |
|----------------|--------------------------|--------------|----------|----------|-------------------------------|-----------------|----------------|------------------------------|---------------------------------------------------|--------------------------------|
| <b>Cochamo</b> | ADCP<br>300 kHz          | 15           | 41.47    | 72.32    | 6 Aug. –<br>10 Oct. 2008      | 10              | 1.0            | < 2<br>[cm s <sup>-1</sup> ] | ± 0.5<br>[cm s <sup>-1</sup> ]                    | 0.1<br>[cm s <sup>-1</sup> ]   |
|                | HOBO<br>U-20             | 14           | 41.51    | 72.30    | 14 Aug. –<br>13 Nov. 2008     | 10              | ---            | ---                          | ± 1.5<br>[cm]                                     | 0.21<br>[cm]                   |
| <b>Puelo</b>   | ADCP<br>600 kHz          | 28           | 41.65    | 72.37    | 16 Aug. –<br>11 Nov. 2008     | 20              | 0.5            | < 2<br>[cm s <sup>-1</sup> ] | ± 0.3<br>[cm s <sup>-1</sup> ]                    | 0.1<br>[cm s <sup>-1</sup> ]   |
|                | ADCP<br>300 kHz          | 34           |          |          | 16 Aug. –<br>11 Nov 2008      | 10              | 1.0            | < 2<br>[cm s <sup>-1</sup> ] | ± 0.5<br>[cm s <sup>-1</sup> ]                    | 0.1<br>[cm s <sup>-1</sup> ]   |
|                | Davis<br>Vantage<br>Pro2 | 10<br>height | 41.68    | 72.38    | 7 Jul. 2008 –<br>18 Feb. 2009 | 10              | ---            | ---                          | direction: 3°<br>speed: 1 [m<br>s <sup>-1</sup> ] | 1°<br>0.4 [m s <sup>-1</sup> ] |
| <b>mouth</b>   | ADCP<br>300 kHz          | 11           | 41.72    | 72.62    | 8 Aug. –<br>6 Nov. 2008       | 10              | 1.0            | < 2<br>[cm s <sup>-1</sup> ] | ± 0.5<br>[cm s <sup>-1</sup> ]                    | 0.1<br>[cm s <sup>-1</sup> ]   |
|                | ADCP<br>75 kHz           | 430          |          |          | 8 Aug. –<br>6 Nov. 2008       | 20              | 8.0            | < 2<br>[cm s <sup>-1</sup> ] | ± 0.5<br>[cm s <sup>-1</sup> ]                    | 0.1<br>[cm s <sup>-1</sup> ].  |
|                | SBE-26                   | 25           | 41.71    | 72.58    | 5 Sep. –<br>11 Nov.2008       | 10              | ---            | ---                          | ± 2.5<br>[cm]                                     | 0.02<br>[cm]                   |

7

1  
2  
3  
4

**S3 Table:** Summary of the along-fjord CTD stations in the Reloncavi fjord. In addition to the position, the bottom depth of each station is indicated.

| <b>CTD N°</b> | <b>Lat [°S]</b> | <b>Lon [°W]</b> | <b>H [m]</b> | <b>CTD N°</b> | <b>Lat [°S]</b> | <b>Lon [°W]</b> | <b>H [m]</b> |
|---------------|-----------------|-----------------|--------------|---------------|-----------------|-----------------|--------------|
| 1             | 41° 24.51'      | 72° 17.57'      | 43           | 11            | 41° 37.86'      | 72° 20.95'      | 177          |
| 2             | 41° 25.33'      | 72° 17.34'      | 59           | 12            | 41° 39.22'      | 72° 21.89'      | 152          |
| 3             | 41° 26.15'      | 72° 18.10'      | 62           | 13            | 41° 41.01'      | 72° 24.16'      | 220          |
| 4             | 41° 26.77'      | 72° 18.49'      | 63           | 14            | 41° 41.90'      | 72° 26.12'      | 266          |
| 5             | 41° 27.66'      | 72° 19.01'      | 76           | 15            | 41° 42.87'      | 72° 28.22'      | 268          |
| 6             | 41° 28.76'      | 72° 19.16'      | 92           | 16            | 41° 42.90'      | 72° 31.24'      | 440          |
| 7             | 41° 29.83'      | 72° 19.10'      | 104          | 17            | 41° 43.48'      | 72° 33.95'      | 450          |
| 8             | 41° 31.59'      | 72° 19.28'      | 190          | 18            | 41° 43.28'      | 72° 36.69'      | 457          |
| 9             | 41° 33.39'      | 72° 19.71'      | 200          | 19            | 41° 42.73'      | 72° 39.28'      | 457          |
| 10            | 41° 35.63'      | 72° 20.36'      | 197          |               |                 |                 |              |

5  
6  
7  
8
